# Supplementary material
Source: PubMed Central journal article supplement (PMC7616956)
Supplement: EMS128573-supplement-Supplementary_Information.pdf [file EMS128573-supplement-Supplementary_Information.pdf]

## Supplementary Information for

### **Inhibition of histone H3K27 demethylases inactivates brachyury (TBXT) and promotes chordoma cell death**

Lucia Cottone, Adam P Cribbs, Garima Khandelwal, Graham Wells, Lorena Ligammari, Martin Philpott, Anthony Tumber, Patrick Lombard, Edward S Hookway, Tamas Szommer, Catrine Johansson, Paul E Brennan, Nischalan Pillay, Richard G Jenner, Udo Oppermann, Adrienne M Flanagan

#### **This PDF file includes:**

- Figures S1 to S7
- Tables S1 to S5
- Captions for Datasets S1 to S3
- Supplementary text
- References for Supplementary Information

#### **Other supplementary materials for this manuscript include the following:**

- Datasets S1 to S3

## Supplementary Figures

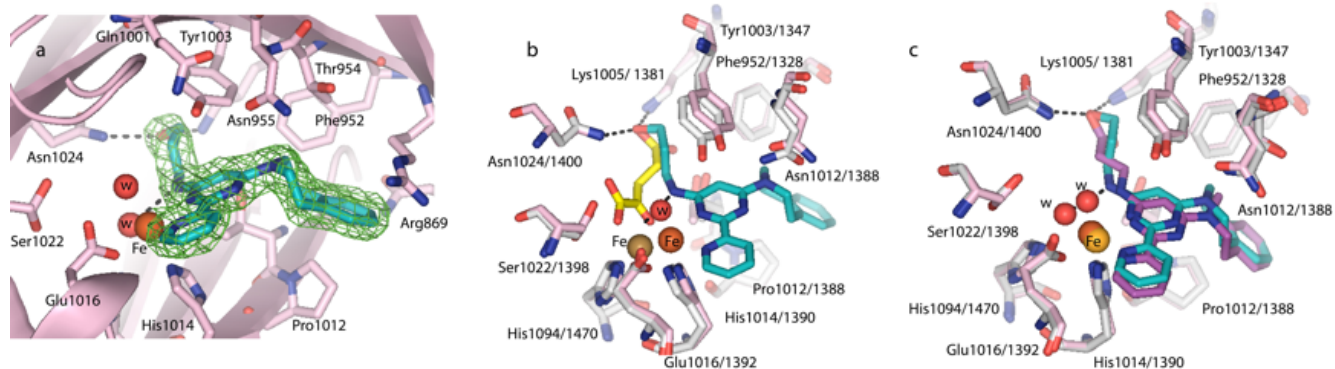

**Figure S1. Ligand structure of human UTY (KDM6C) in complex with KDOBA67.** Crystal structure of UTY in complex with the inhibitor KDOBA67a shows identical ligand binding as KDM6B/GSK-J1. (A) Representation of the ligand binding pocket in UTY (pdb 5A1L, rendered in pink) in complex with KDOBA67a (cyan). Amino acid side-chains lining the active site are depicted as sticks. The position of the catalytic metal ion and water molecules are shown as orange/brown spheres. The 2FoFc electron density map is contoured at 1.0 sigma. (B) KDOBA67 occupies part of the cofactor site in KDM6 enzymes, demonstrated through an overlay of UTY (pdb 5A1L, pink) with KDM6B (grey) in complex with the 2-oxoglutarate cofactor (yellow) (PDB 2XUE). (C) KDOBA67 shows equivalent occupation and residue contacts in the active site of KDM6 enzymes, demonstrated through an overlay of UTY/KDOBA67 and KDM6B/GSK-J1 (magenta) (PDB 4ASK) complexes.

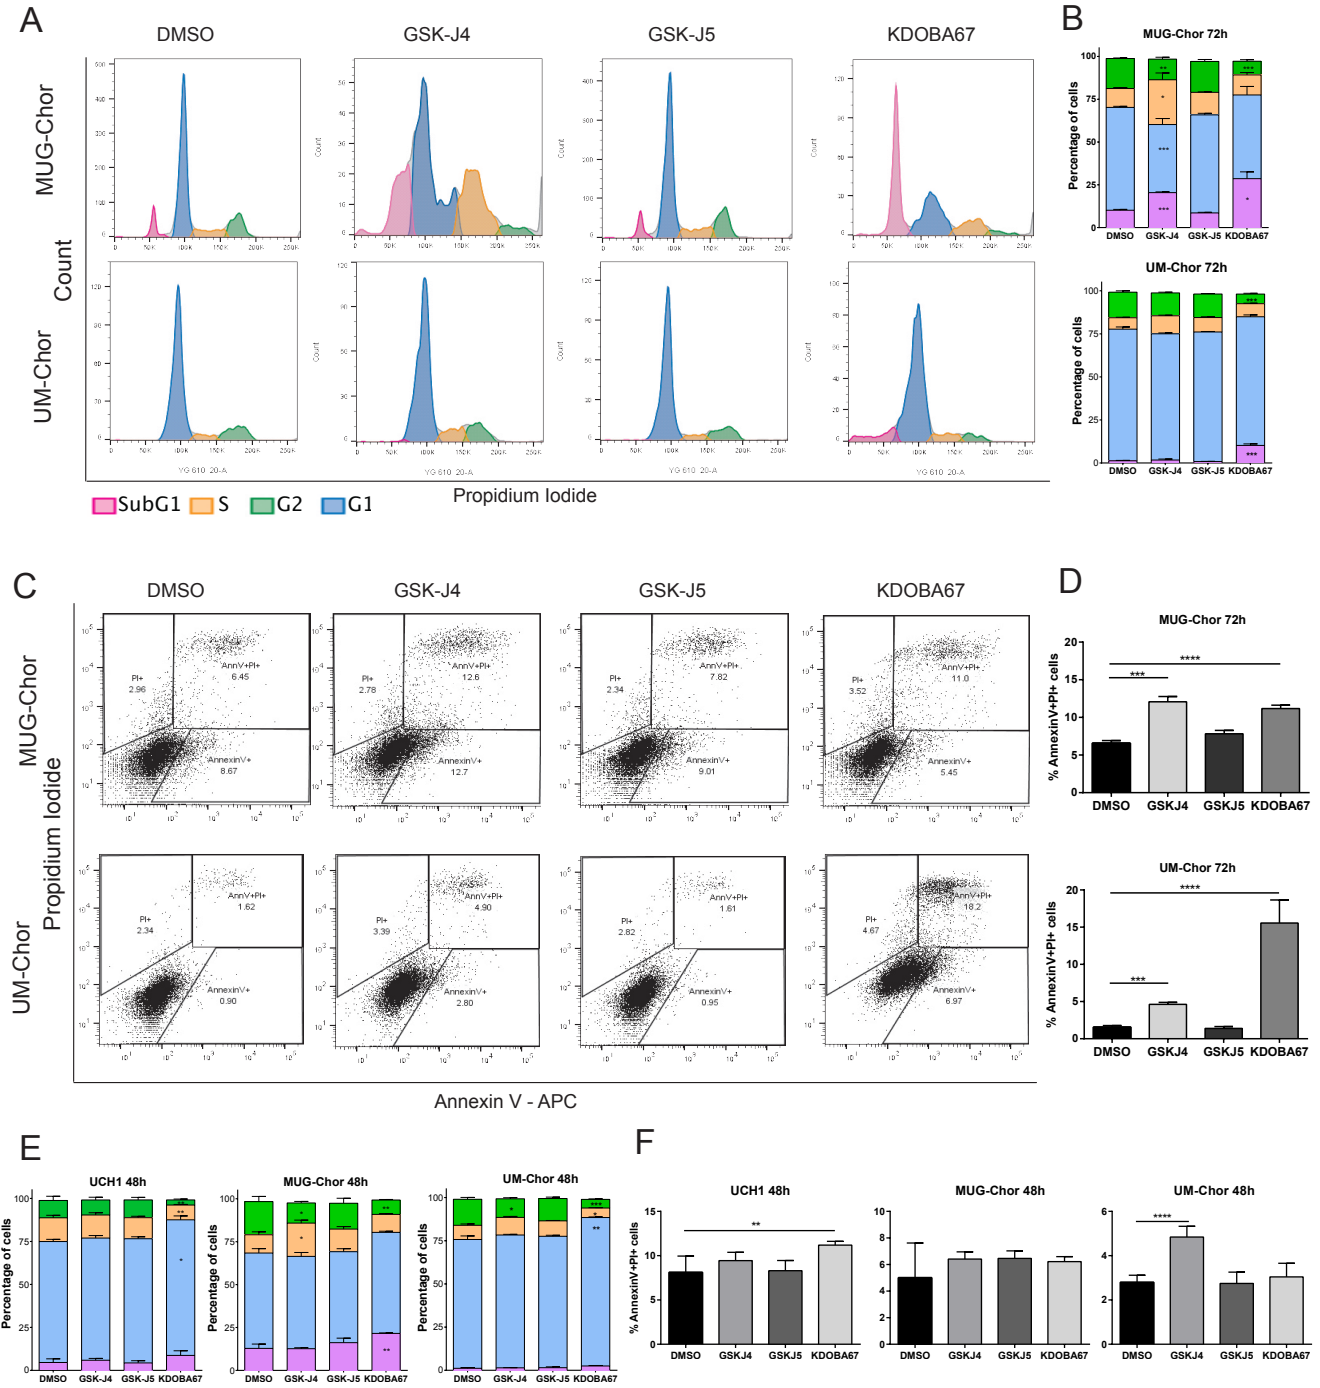

**Figure S2. H3K27 lysine demethylase inhibitors induce cell cycle arrest and apoptosis in chordoma cell lines. (A-D)** Cell cycle changes (A-B) and cell death analysis (C-D) in UM-Chor and MUG-Chor following 72 hours of exposure to the compounds. By 72 hours, there is evidence of apoptosis as determined by an increase in sub-G1 and in AnnexinV-PI-positive population in response to GSK-J4 and KDOBA67. **(E-F)** Cell cycle changes (E) and cell death analysis (F) in UCH1, UM-Chor and MUG-Chor following 48 hours of treatment with the compounds at which time there is a significant increase in the G1 population and reduction in the S population in UCH1 and UM-Chor only, and a significant increase in sub-G1 population in MUG-Chor. There is a slight increase in the AnnexinV-PI-positive population in response to GSK-J4 and KDOBA67. Representative histogram/dot plots and quantification of 3 independent experiments, with 3 replicates per condition per experiment. \* $p \leq 0.05$ , \*\* $p \leq 0.01$ , \*\*\* $p \leq 0.001$ , \*\*\*\* $p \leq 0.0001$ .

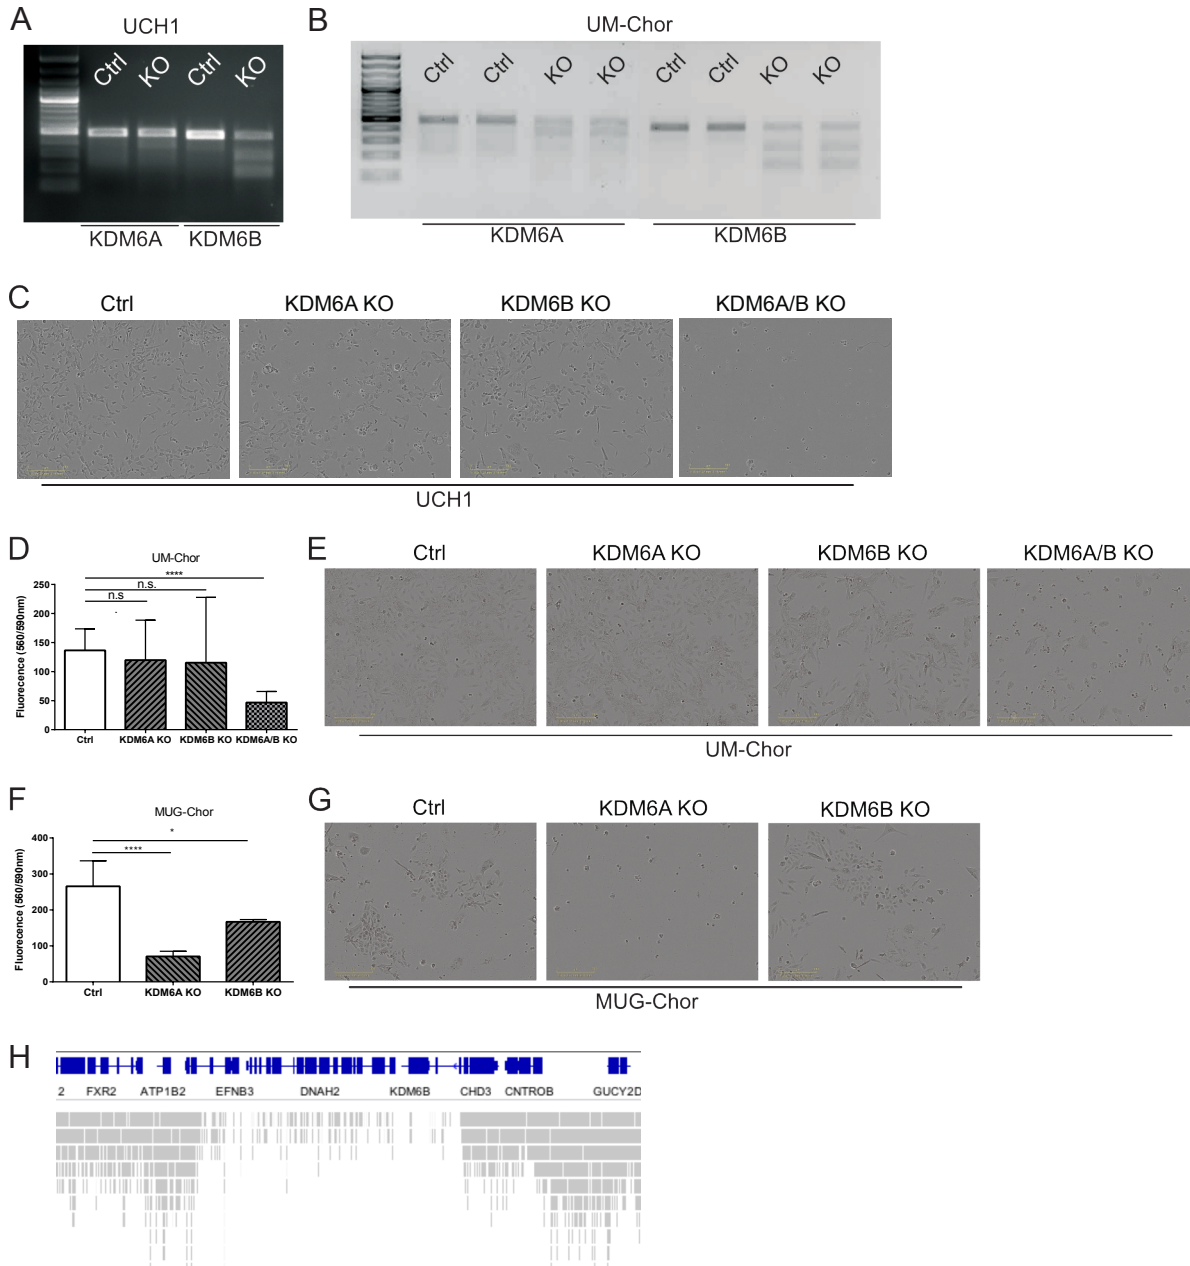

**Figure S3. CRISPR/Cas9 mediated *KDM6A* and *KDM6B* knockout.** (A-B) Cleavage assay for UCH1 and UM-Chor for cells transduced with empty-Lenti-Cas9-vector (Control, ctrl), guideRNA-directed at *KDM6A* or *KDM6B*, show efficient gene editing at the predicted site. (C) Bright field images of UCH1 with CRISPR editing of *KDM6A/B* and both. (D-E) CRISPR/Cas9 knock-out of *KDM6A* and *KMD6B* induces cell growth arrest in UM-Chor chordoma cell line. Cell viability and representative images of chordoma cells transduced with empty-Lenti-Cas9-vector, guideRNA-directed towards *KDM6A*, *KDM6B* or co-transduced with both. (F-H) In MUG-Chor cell line knock-out of *KDM6A* is sufficient to reduce cell viability, because MUG-Chor contains a biallelic deletion of *KDM6B* as visualised by genome sequencing generated from the ChIP input in (H). Quantification of 2 independent experiments, with 2 biological replicates per condition. \* $p \leq 0.05$ , \*\* $p \leq 0.01$ , \*\*\* $p \leq 0.001$ , \*\*\*\* $p \leq 0.0001$ .



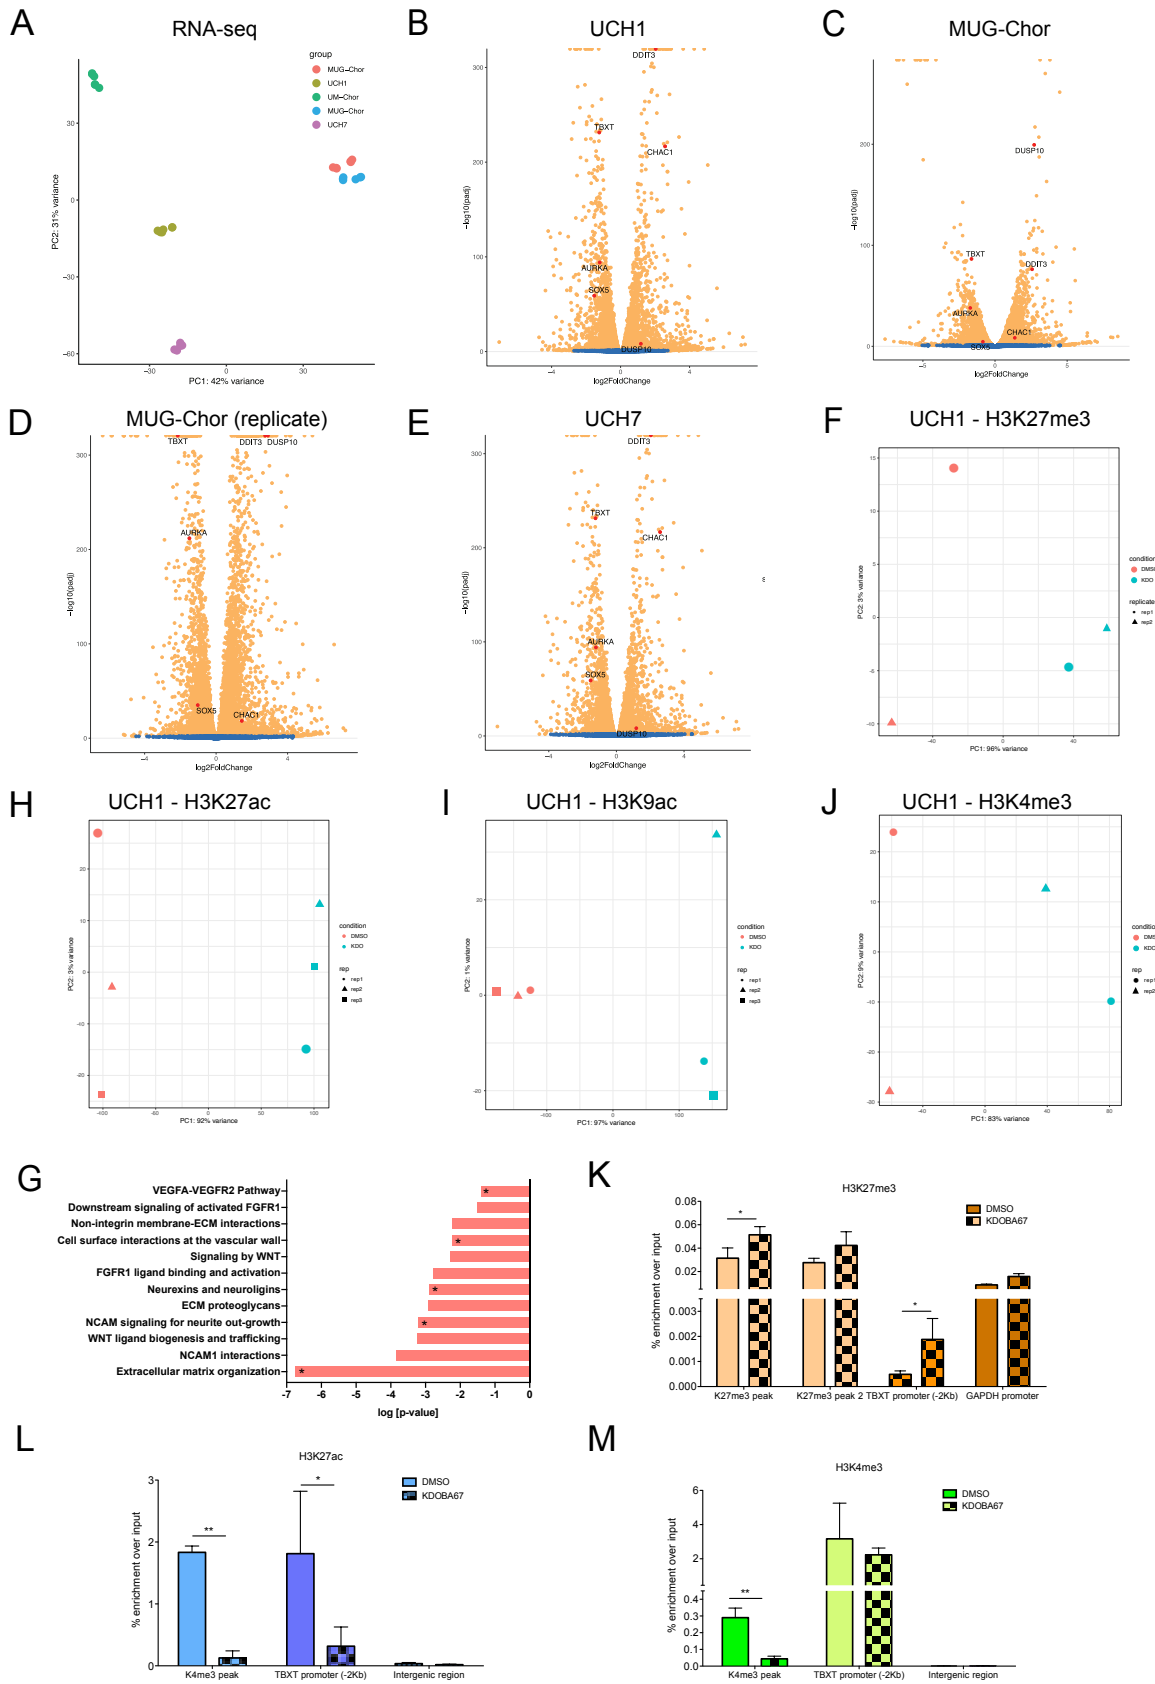

**Figure S4. Transcriptomic and ChIP analysis of chordoma cell lines in response to KDOBA67.** (A) PCA plot of all RNA sequencing data for UCH1, UCH7, MUG-Chor, UM-Chor, 3 biological replicates per cell lines per treatment. Two independent datasets were generated for MUG-Chor, and the very close clustering shows high reproducibility of the data. (B-E) Volcano plot summarising differential gene expression in chordoma cells following treatment with KDOBA67 for 48 hours, by RNA-seq. (F and H-J) PCA plot of all ChIP-Rx data of UCH1. For H3K27me3 and H3K4me3 only 2 out of 3 replicates per treatment were of good quality and have been used for the analysis. (G) Reactome analysis for H3K27me3 differentially bound peaks in UCH1 in response to KDOBA67. Asterisks (\*) mark pathways also identified in the Reactome analysis of RNA-seq data for UCH1. See also **Dataset S3**. (K-M) ChIP-qPCR results of H3K27me3, H3K27ac and H3K4me3 for UM-Chor cells following treatment with KDOBA67 for 48 hours. TBXT promoter region analysed is -2Kb from the TSS. K27me3 peak1, K27me3 peak2 and K4me3 peak are positive peaks identified in UCH1 by ChIP-Rx. Results from 4 biological replicates per condition. \* $p \leq 0.05$ , \*\* $p \leq 0.01$ , \*\*\* $p \leq 0.001$ , \*\*\*\* $p \leq 0.0001$ .

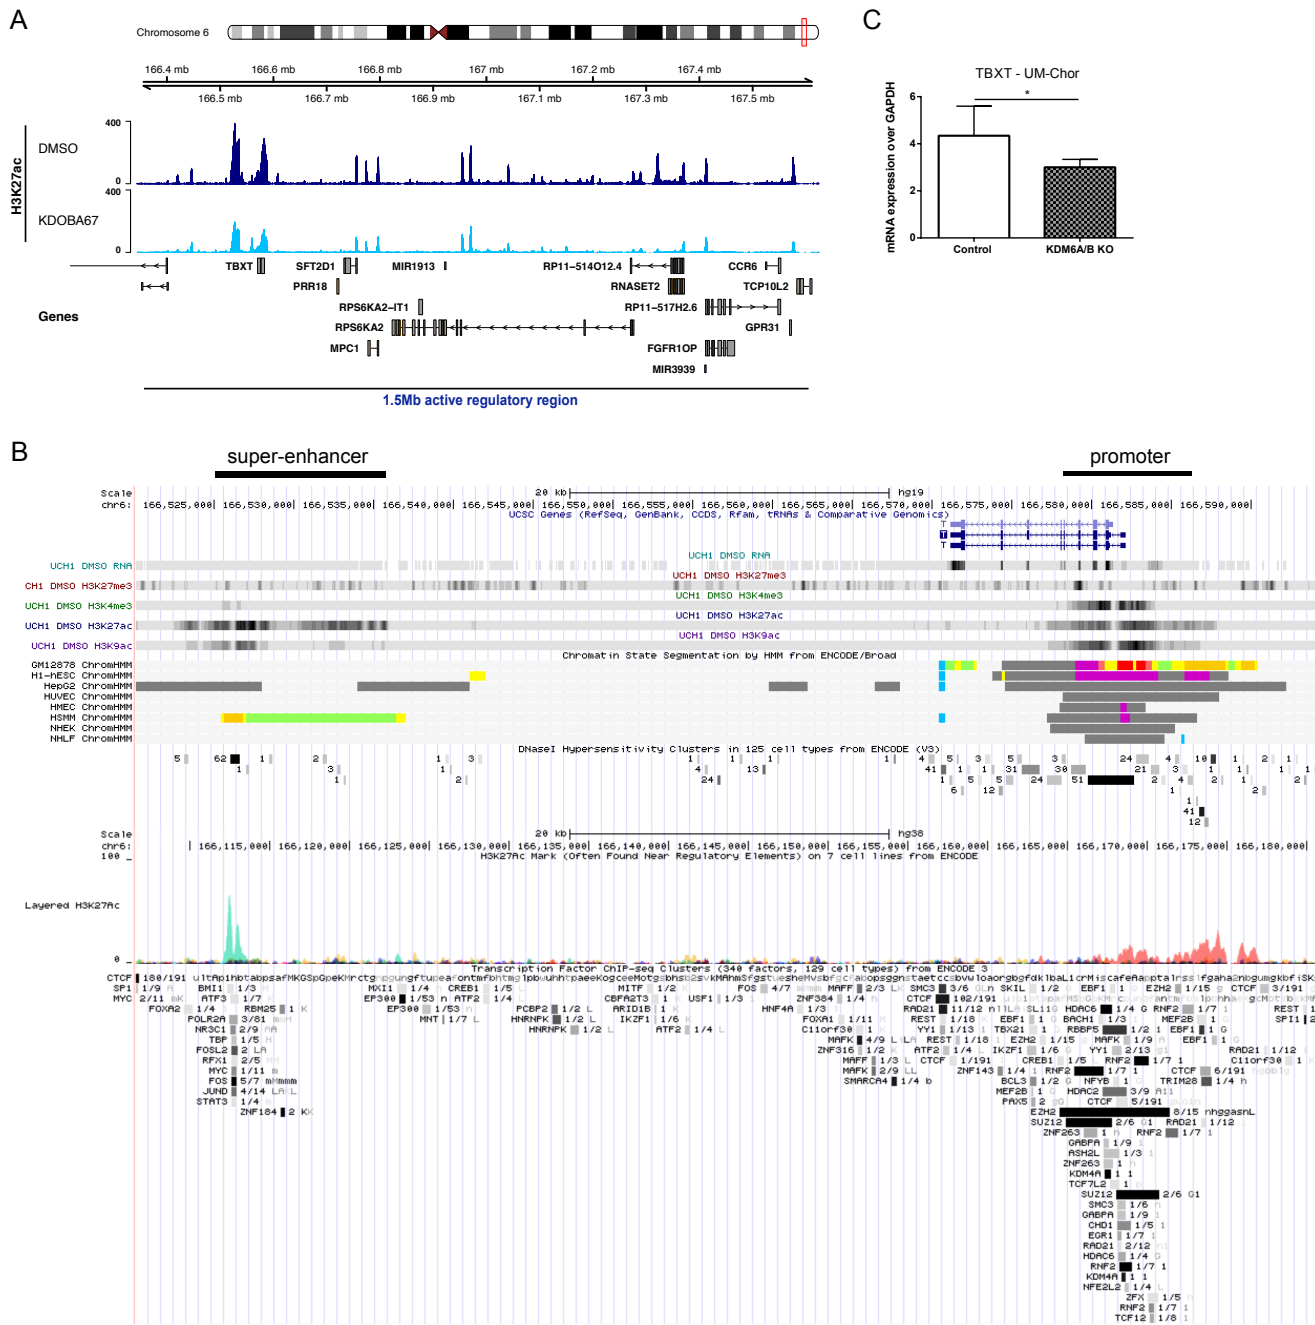

**Figure S5. Specific inhibition of H3K27 lysine demethylase leads to changes in the *TBXT* regulatory region.** (A) H3K27ac tracks for UCH1 showing a reduction in the previously described 1.5Mb active regulatory region around *TBXT*. Tracks show the average of 3 biological replicates. (B) Visualization of the regulatory region around *TBXT* including at the promoter and super-enhancer in the UCH1 cell line (our data, top 5 tracks) and in publicly available ENCODE datasets. Chromatin State Segmentation by HMM from ENCODE/Broad (1) shows that an active promoter (red/purple) is present at the promoter region and that a strong enhancer (yellow) is detected in the super-enhancer region. These two regions are also characterised by several DNaseI hypersensitivity sites (2,3), H3K27ac enrichment and binding of several transcription factors (including CTCF and EZH2) in 129 cell lines reported in the ENCODE project (4). (C) Expression of *TBXT* is reduced in UM-Chor upon double knock-out (KO) of *KDM6A/B*, as assessed by qPCR. Quantification of 2 independent experiments, with 2 biological replicates per condition. \* $p \leq 0.05$ , \*\* $p \leq 0.01$ , \*\*\* $p \leq 0.001$ , \*\*\*\* $p \leq 0.0001$ .

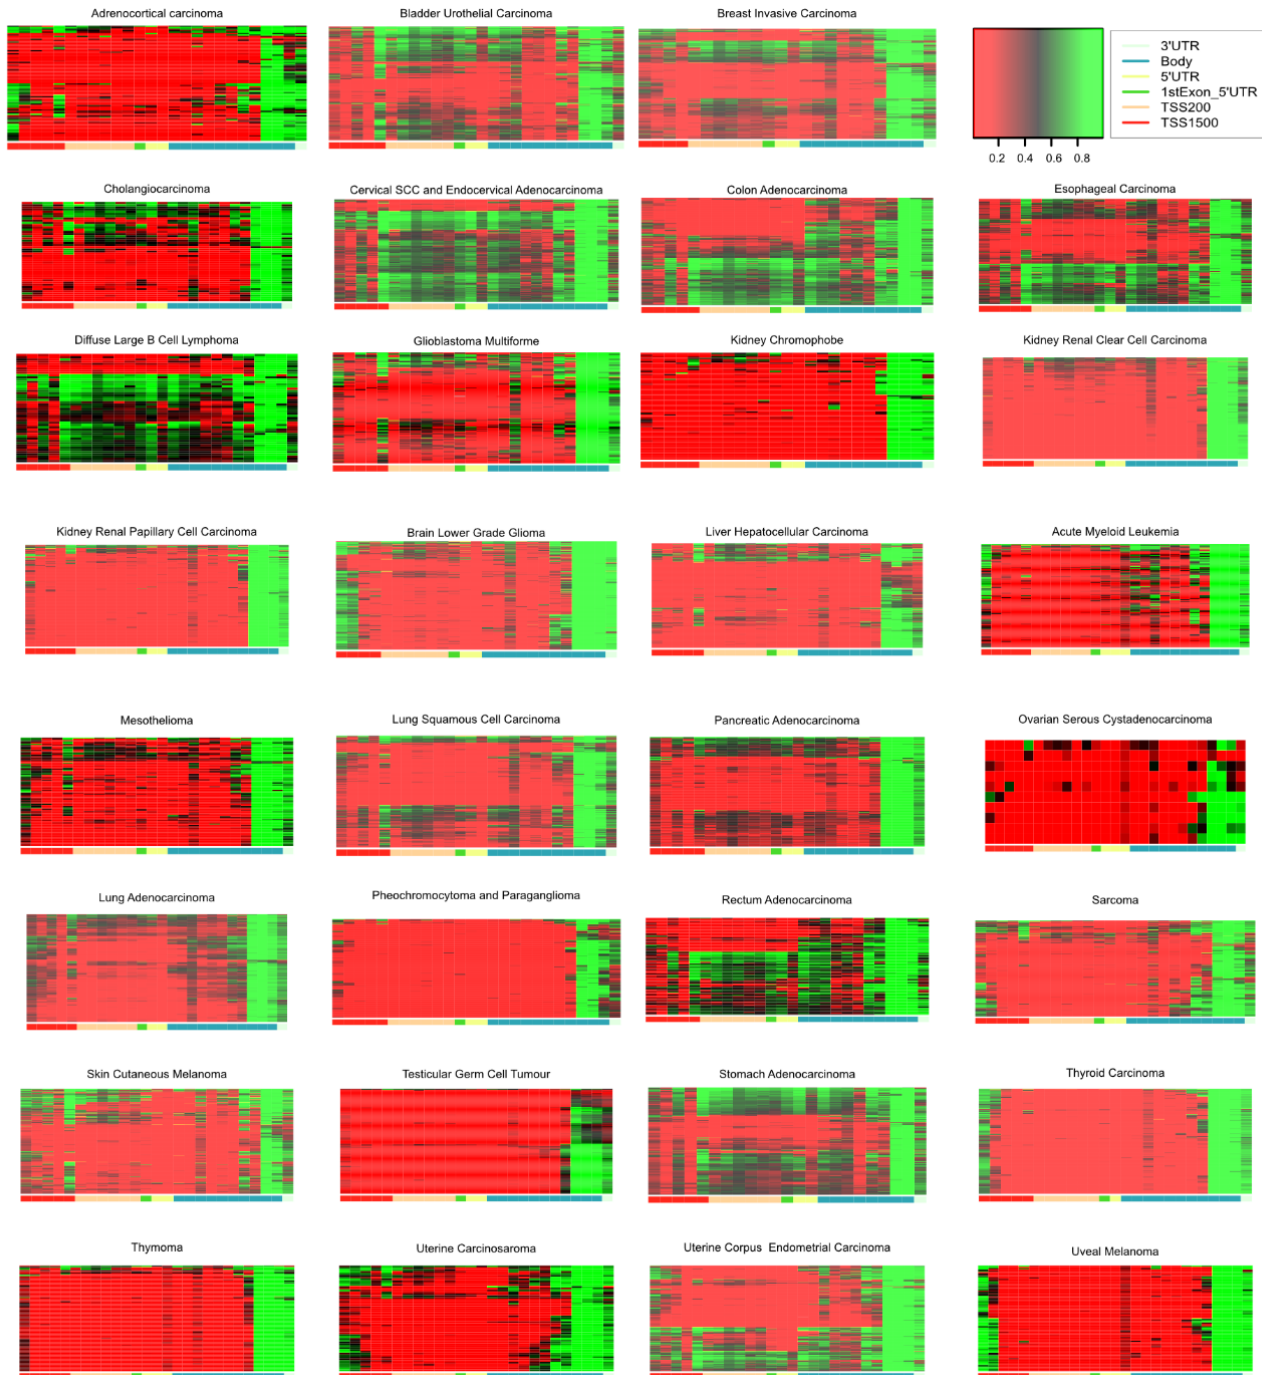

**Figure S6. Methylation profiles of *TBXT* promoter in a range of solid tumours.** Data from the Cancer Tumor Genome Atlas (TCGA) showed that the promoter of *TBXT* is unmethylated in a variety of malignancies, known not to express *TBXT*. Low levels of methylation are prominent in cervical squamous cell carcinomas, diffuse B cell lymphomas and adenocarcinomas of the gastrointestinal tract, tumours which are rarely reported to express *TBXT* protein.

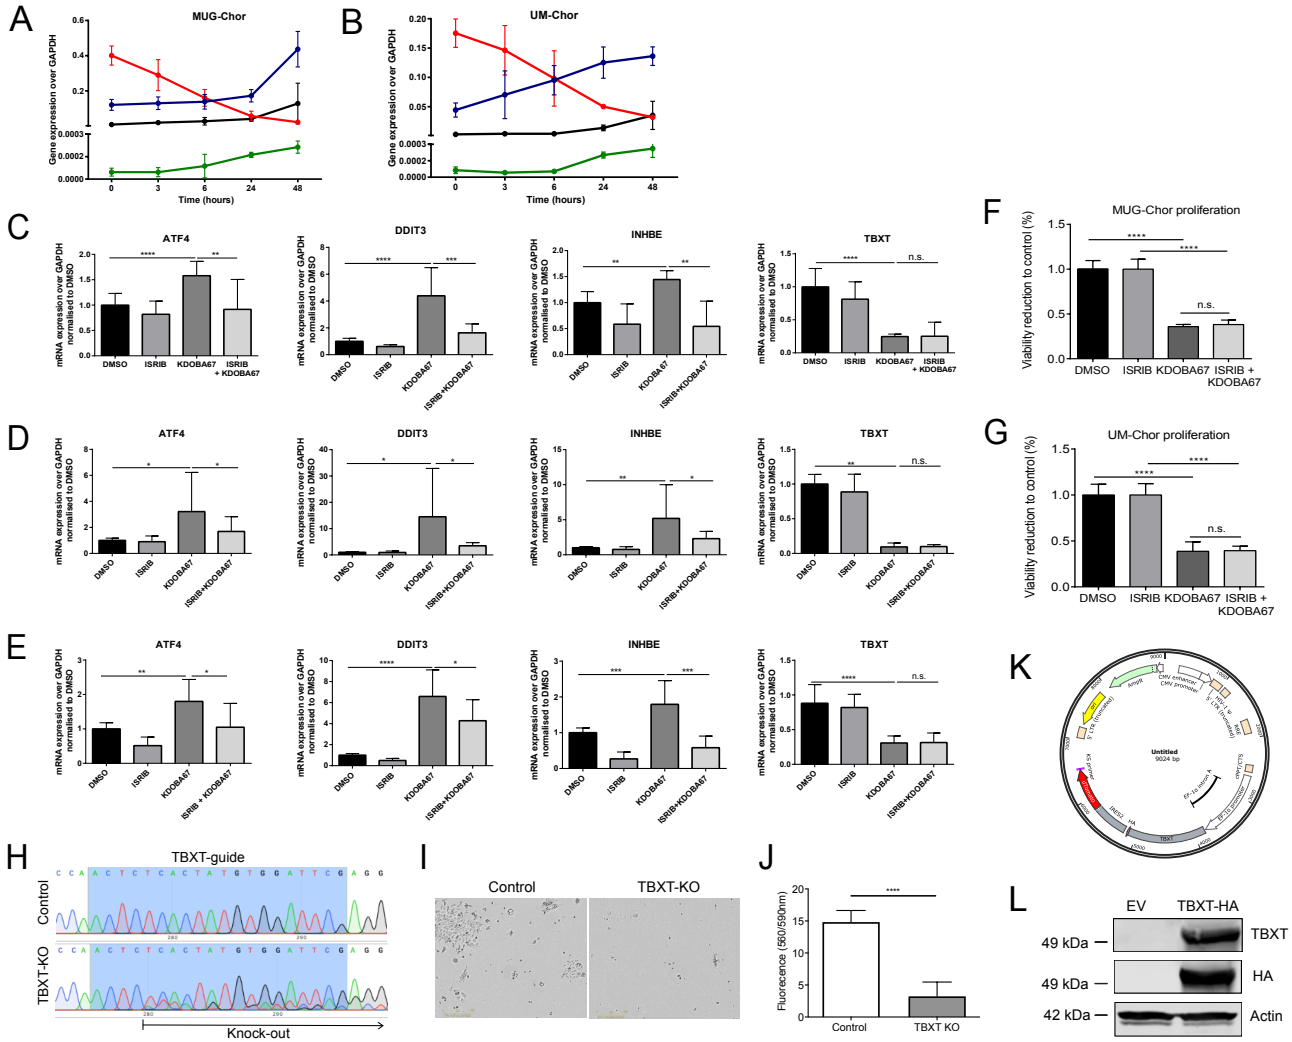

**Figure S7. The ATF4-response is activated in patient-derived primary chordoma cell cultures and two additional chordoma cell lines but does not contribute to *TBXT* suppression in response to KDOBA67. (A-B)** Expression of *TBXT*, *ATF4* and *ATF4*-target genes *DDIT3*, *INHBE* over a time course in response to KDOBA67 in UCH1, MUG-Chor and UM-Chor as assessed by qPCR. Results from 2 independent experiments, with 3 replicates per condition per cell line. **(C-E)** Co-treatment of KDOBA67 and ISRIB for 48 hours suppresses the induction of *ATF4* and *ATF4*-target genes (*DDIT3*, *INHBE*) but does not prevent the downregulation of *TBXT* induced by KDOBA67, as assessed by qPCR in UCH1 (C) MUG-Chor (D) and UM-Chor (E). Results from 3 independent experiments, with 3 biological replicates per condition. **(F-G)** Proliferation in response to KDOBA67 in the presence of ISRIB as assessed by Presto Blue assay in MUG-Chor (F) and UM-Chor (G). Results from 3 independent experiments, with 3 biological replicates per condition. **(H)** Sanger sequencing of MUG-Chor cells transduced with empty-Lenti-Cas9-vector (Control) and Lenti-Cas9-vector with guideRNA-directed at *TBXT* (TBXT-KO) (guide highlighted in blue) shows efficient gene editing at the predicted knock out site. **(I)** Bright field images of MUG-Chor following CRISPR/Cas9 editing of *TBXT* and Control. **(J)** Knock-out of *TBXT* induces cell growth arrest in MUG-Chor chordoma cell line, assessed by Presto Blue proliferation. 6 replicates. **(K-L)** Map of the expression vector containing TBXT-HA-dTomato (K) and expression of *TBXT* together with HA tag at the protein level following expression of the vector in HEK-293T cells by western blot, where beta actin is used as an endogenous control (L). \* $p \leq 0.05$ , \*\* $p \leq 0.01$ , \*\*\* $p \leq 0.001$ , \*\*\*\* $p \leq 0.0001$ .

## Supplementary Tables

**Table S1. STR (Short Tandem Repeat) analysis results for UCH1, MUG-Chor, UM-Chor and UCH7 used in the study (most recent results obtained in March 2018 for MUG-Chor, UM-Chor, UCH7 and in December 2019 for UCH1).**

| Cell line      | Marker          | UCL profiles |          | Database profiles |          |    |
|----------------|-----------------|--------------|----------|-------------------|----------|----|
|                |                 | Allele 1     | Allele 2 | Allele 1          | Allele 2 |    |
| <b>UCH1</b>    | AMEL            | X            | Y        | X                 | Y        |    |
|                | CSF1PO          | 10           | 11       | 10                | 11       |    |
|                | D13S317         | 11           | 13       | 11                | 13       |    |
|                | D16S539         | 12           | 13       | 12                | 13       |    |
|                | D18S51          | 15           | 15       | 15                | 15       |    |
|                | D21S11          | 28           | 29       | 28                | 29       |    |
|                | D3S1358         | 15           | 15       | 15                | 15       |    |
|                | D5S818          | 11           | 12       | 11                | 12       |    |
|                | D7S820          | 9            | 12       | 9                 | 12       |    |
|                | D8S1179         | 10           | 15       | 10                | 15       |    |
|                | FGA             | 20           | 21       | 20                | 21       |    |
|                | Penta D         | 11           | 11       | 11                | 11       |    |
|                | Penta E         | 7            | 10       | 7                 | 10       |    |
|                | TH01            | 7            | 7        | 7                 | 7        |    |
|                | TPOX            | 8            | 11       | 8                 | 11       |    |
|                | vWA             | 17           | 17       | 17                | 17       |    |
|                | AMEL            | X            | X        | X                 | X        |    |
|                | <b>MUG-Chor</b> | CSF1PO       | 11       | 11                | 11       | 11 |
|                |                 | D13S317      | 11       | 11                | 11       | 11 |
|                |                 | D16S539      | 11       | 14                | 11       | 14 |
| D18S51         |                 | 17           | 23       | 17                | 23       |    |
| D21S11         |                 | 29           | 33.2     | 29                | 33.2     |    |
| D3S1358        |                 | 14           | 17       | 14                | 17       |    |
| D5S818         |                 | 11           | 12       | 11                | 12       |    |
| D7S820         |                 | 8            | 11       | 8                 | 11       |    |
| D8S1179        |                 | 11           | 12       | 11                | 12       |    |
| FGA            |                 | 21           | 26       | 21                | 26       |    |
| Penta D        |                 | 13           | 13       | 13                | 13       |    |
| Penta E        |                 | 5            | 12       | 5                 | 12       |    |
| TH01           |                 | 9.3          | 9.3      | 9.3               | 9.3      |    |
| TPOX           |                 | 8            | 8        | 8                 | 8        |    |
| vWA            |                 | 15           | 15       | 15                | 15       |    |
| <b>UM-Chor</b> | AMEL            | X            | Y        | X                 | Y        |    |
|                | CSF1PO          | 11           | 12       | 11                | 12       |    |
|                | D13S317         | 12           | 12       | 12                | 12       |    |
|                | D16S539         | 12           | 12       | 12                | 12       |    |
|                | D18S51          | 14           | 14       | 14                | 14       |    |
|                | D21S11          | 27           | 31       | 27                | 31       |    |
|                | D3S1358         | 18           | 18       | 18                | 18       |    |
|                | D5S818          | 9            | 13       | 9                 | 13       |    |
|                | D7S820          | 11           | 11       | 11                | 11       |    |
|                | D8S1179         | 12           | 13       | 12                | 13       |    |
|                | FGA             | 23           | 23       | 19                | 23       |    |
|                | Penta D         | 8            | 9        | 8                 | 9        |    |
|                | Penta E         | 7            | 7        | 7                 | 7        |    |
|                | TH01            | 7            | 9.3      | 7                 | 9.3      |    |
|                | TPOX            | 8            | 9        | 8                 | 9        |    |
| vWA            | 15              | 15           | 15       | 15                |          |    |
| <b>UCH-7</b>   | AMEL            | 17           |          |                   |          |    |
|                | CSF1PO          | 7            |          |                   |          |    |
|                | D13S317         | 30           | 33.2     |                   |          |    |
|                | D16S539         | 16           |          |                   |          |    |



|  |         |    |    |  |  |
|--|---------|----|----|--|--|
|  | D18S51  | 12 | 15 |  |  |
|  | D21S11  | 12 | 13 |  |  |
|  | D3S1358 | 10 |    |  |  |
|  | D5S818  | 10 | 11 |  |  |
|  | D7S820  | 10 | 12 |  |  |
|  | D8S1179 | 12 |    |  |  |
|  | FGA     | 12 | 13 |  |  |
|  | Penta D | X  | Y  |  |  |
|  | Penta E | 16 | 17 |  |  |
|  | TH01    | 14 | 16 |  |  |
|  | TPOX    | 8  | 11 |  |  |

**Table S2. Table of IC50 values against selected KDM members as determined by Alphascreen (values in  $\mu\text{M}$ ).**

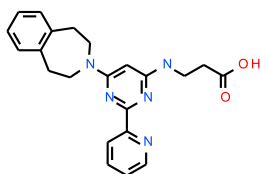

GSK-J1

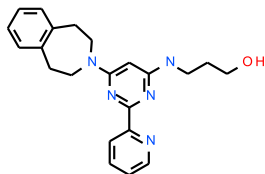

KDOBA67

|         | KDM3  | KDM4   | KDM5    | KDM5    | KDM5    | KDM6  |
|---------|-------|--------|---------|---------|---------|-------|
|         | JmjD1 | JmjD2C | JARID1A | JARID1B | JARID1C | JmjD3 |
| GSK-J1  | >10   | >10    | 2.5     | 0.4     | 1.3     | 0.16  |
| GSK-J4  | >100  | >100   | >100    | >100    | >100    | >100  |
| KDOBA67 | >100  | >100   | 24.0    | 28.2    | 62      | 0.24  |

**Table S3: X-ray data collection and refinement statistics for human UTY (KDM6C) in complex with KDOBA67 (pdb 5A1L).**

| <b>Data collection</b>                              |                                                       |
|-----------------------------------------------------|-------------------------------------------------------|
| Space group                                         | <i>P</i> 2 <sub>1</sub> 2 <sub>1</sub> 2 <sub>1</sub> |
| Cell dimensions                                     |                                                       |
| <i>a</i> , <i>b</i> , <i>c</i> (Å)                  | 90.71, 110.5, 119.46                                  |
| $\alpha$ , $\beta$ , $\gamma$ (°)                   | 90, 90, 90                                            |
| Resolution (Å)                                      | 29.31 - 2<br>(2.0 - 2.11)                             |
| <i>R</i> <sub>merge</sub>                           | 0.019 (0.89)                                          |
| Mean <i>I</i> / $\sigma$ <i>I</i>                   | 2.3                                                   |
| Completeness (%)                                    | 99.4 (99.4)                                           |
| Redundancy                                          | 6.2 (5.8)                                             |
| <b>Refinement</b>                                   |                                                       |
| Resolution (Å)                                      | 2.0                                                   |
| No. reflections                                     | 76980                                                 |
| <i>R</i> <sub>work</sub> / <i>R</i> <sub>free</sub> | 0.188/0.225                                           |
| No. atoms                                           |                                                       |
| Protein                                             | 7044                                                  |
| Ligand/ion                                          | 104                                                   |
| Water                                               | 680                                                   |
| <i>B</i> -factors                                   |                                                       |
| Protein                                             | 36.70                                                 |
| Ligand/ion                                          | 51.00                                                 |
| Water                                               | 42.70                                                 |
| R.m.s deviations                                    |                                                       |
| Bond lengths (Å)                                    | 0.019                                                 |
| Bond angles (°)                                     | 1.33                                                  |

**Table S4. List of antibodies used in this study**

| Protein                              | Kda | Brand                    | Cat. Number | Species | Clonality  | Dilution |
|--------------------------------------|-----|--------------------------|-------------|---------|------------|----------|
| <b>ChIP</b>                          |     |                          |             |         |            |          |
| HA tag                               |     | Abcam                    | Ab9110      | Rabbit  |            |          |
| H3 Total                             |     | Abcam                    | Ab 1791     |         |            |          |
| H3K27me3                             |     | Millipore                | 07-449      | Rabbit  |            |          |
| IgG control (anti-mouse IgG (Z0259)) |     | Dako                     | Z0259       | Rabbit  | Polyclonal |          |
| H3K9me2                              |     | Millipore                | 17-648      |         |            |          |
| H3K4me3                              |     | Millipore                | 07-473      | Rabbit  | Polyclonal |          |
| H3K4me3                              |     | Abcam                    | ab8580      | Rabbit  | Polyclonal |          |
| H3K27ac                              |     | Abcam                    | Ab4729      | Rabbit  | Polyclonal |          |
| H3K9ac                               |     | Abcam                    | Ab4441      | Rabbit  | Polyclonal |          |
| KDM6A/UTX                            |     | Abcam                    | ab36938     | Rabbit  | Polyclonal |          |
| KDM6B/Jmjd3                          |     | Abcam                    | ab38113     | Rabbit  | Polyclonal |          |
| <b>Western Blot</b>                  |     |                          |             |         |            |          |
| <i>B-actin</i>                       | 42  | Sigma                    | A5441       | Mouse   | Monoclonal | 1:5000   |
| Brachyury (A-4)                      | 49  | Santa Cruz Biotechnology | Sc-374321   | Mouse   | Monoclonal | 1:1000   |
| HA-tag                               |     | Abcam                    | Ab9110      | Rabbit  | Polyclonal |          |
| <b>Immunofluorescence</b>            |     |                          |             |         |            |          |
| Brachyury (A-4)                      |     | Santa Cruz Biotechnology | Sc-374321   | Mouse   | Monoclonal | 1:250    |
| Anti-mouse-Alexa488                  |     | Thermo Scientific        | Fisher      | Rabbit  |            | 1:500    |

**Table S5. List of primers used in this study.**

| Gene                          | Application | Fw Primer                | Rev primer               |
|-------------------------------|-------------|--------------------------|--------------------------|
| TBXT                          | qPCR        | CCCGTCTCCTTCAGCAAAGTC    | TGGATTCGAGGCTCATACTTATGC |
| GAPDH                         | qPCR        | GCACCGTCAAGGCTGAGAAC     | TGGTGAAGACGCCAGTGGA      |
| ATF4                          | qPCR        | ATGACCGAAATGAGCTTCCTG    | GCTGGAGAACCCATGAGGT      |
| DDIT3                         | qPCR        | ATGAACGGCTCAAGCAGGAA     | GCAGATTACCATTCCGGTCAA    |
| INHBE                         | qPCR        | CTCTGCCCTCTAGTGGCTTGA    | CGCCTCGGTTGTCCAGTAA      |
| MT1X                          | qPCR        | ACGCTTTTCATCTGTCCCGC     | GGGTCCATTTTCGAGGCAAGG    |
| KDM6A                         | qPCR        | AGCGCAAAGGAGCCGTGGAAAA   | GTCGTTACCATTAGGACCTGC    |
| KDM6B                         | qPCR        | GACCCTCGAAATCCCATCACAG   | GTGCGAACTTCCACGGTGTGTT   |
| TBXT nascent RNA              | qPCR        | GCCTCCTCACCATCTCCAC      | CCTCCTGCACTGAAACCTT      |
| ACTB nascent RNA              | qPCR        | AGCACAGAGCCTCGCCTTT      | TCATCCATGGTGAGCTGGC      |
| ATF4 nascent RNA              | qPCR        | CGTATTTGGACGTGGGGACG     | ACAAAATGGACGCTCACGGA     |
| DDIT3 nascent RNA             | qPCR        | CGTCCGAAGCAATAGGGGTT     | AAGTTAGGGACCGTCCGAGA     |
| INHBE nascent RNA             | qPCR        | CTTTCGGGCAGACTCCACTT     | ATGGTACAGGTGGTGGGACC     |
| TBXT promoter -1Kb            | ChIP-PCR    | GAGAAGGGGAGAGAAGGAGCC    | TTTCCCGCGGACATGGTAT      |
| TBXT promoter -2Kb            | ChIP-PCR    | AAGCATGTTTTCGGTGGGAC     | TAACAATGCGCTTCCTTGGG     |
| TBXT exon 3                   | ChIP-PCR    | AACGCCATGTACTCCTTCT      | CCGTTGAGCTTGTGGTGAG      |
| HOXA7 promoter -1Kb           | ChIP-PCR    | AGAGAGATTGCCACCGCAA      | TCACTGCTTCCTTTAGGGCG     |
| TBXT Intergenic region +300Kb | ChIP-PCR    | CACACCTGGATTGGCAATGG     | CCTGCACCTTTCCTACCTGA     |
| TBXT Super-enhancer           | ChIP-PCR    | GCAGGTCAGAAACACAGGTC     | TGCACTTGACTTCCTTTGCC     |
| GAPDH Promoter                | ChIP-PCR    | ATGTAGACCCCTTGAAGAGG     | GGTTGAGCACAGGGTACTTT     |
| K27me3 peak 1                 | ChIP-PCR    | CATCGGGCTTCAGTAGTTGC     | TCTCCACTGGCCAAAAGAT      |
| K27me3 peak 2                 | ChIP-PCR    | CATCGGGCTTCAGTAGTTGC     | TCTCCACTGGCCAAAAGAT      |
| K4me3 peak                    | ChIP-PCR    | CTAGCCCAGGTGAAGGACAT     | CCCAAATGCTTCAGGAGAGC     |
| CRISPR guide KDM6A            | CRISPR      | CAGCATTATCTGCATACCAG (5) |                          |
| CRISPR guide KDM6B            | CRISPR      | GACAAAAGTACTGTTATCGG (6) |                          |
| CRISPR guide TBXT             | CRISPR      | CGAATCCACATAGTGAGAGT     |                          |

## **Captions for Supplementary Datasets**

**Dataset S1. List of compounds used in the compound drug screen including screening concentration, supplier, references and proliferation raw data (related to Fig. 1A). Attached as separate file (Excel).**

**Dataset S2. List of differentially expressed genes and differentially enriched pathways (Reactome) in all chordoma cell lines in response to treatment with KDOBA67 for 48 hours. Attached as separate file (Excel).**

**Dataset S3. List of differentially pathways (Reactome) overlapping with differentially enriched H3K27me3 peaks in UCH1 in response to treatment with KDOBA67 for 48 hours. Attached as separate file (Excel).**



## Supplementary Text

### SI Materials and Methods

**Chromatin Immunoprecipitation.** Cells were fixed in 1% formaldehyde for 10 minutes prior to quenching with excess glycine. Cells were resuspended on ice in a cell lysis buffer (10 mM Tris-HCL, 10 mM NaCl, 0.5 % NP-40, all reagents were from Sigma-Aldrich) for 15 minutes, centrifuged, and resuspended in nuclear lysis buffer (50 mM Tris-HCL, 10 mM EDTA, 1 % SDS, all from Sigma-Aldrich) for 10 minutes. Samples were diluted with 2 volumes of dilution buffer (16.7 mM Tris-HCL, 167 mM NaCl, 1.2 mM EDTA, 0.01 % SDS, all from Sigma-Aldrich) and sonicated on a Bioruptor Pico (Diagenode, Belgium) for 10 cycles of 30 seconds on/30 seconds off. Sonication efficiency was checked by running a sample of de-crosslinked material on a 2 % agarose gel. Samples were incubated overnight rotating at 4°C using antibody pre-incubated with protein A/G magnetic beads. Beads were washed sequentially with buffer 1 (50 mM Tris, 500 mM NaCl, 1 mM EDTA, 1 % Triton X-100, 0.1 % sodium deoxycholate, 0.1 % SDS, all from Sigma-Aldrich) three times, buffer 2 (20 mM Tris, 1 mM EDTA, 250 mM LiCl, 0.5% NP-40, 0.5% sodium deoxycholate, all from Sigma-Aldrich) three times and twice with TE buffer + 50 mM NaCl. DNA was eluted in buffer containing 50 mM Tris, 10 mM EDTA and 1% SDS before treatment with proteinase K and RNase-A (both Thermo Fisher Scientific). DNA was eluted and de-crosslinked from beads prior to purification using home made Solid Phase Reversible Immobilization (SPRI) magnetic beads (prepared as previously described(7)). In order to perform ChIP for H3.3, cells lines (UCH1, UM-Chor, MUG-Chor and U2OS) were transduced with a lentiviral vector containing full length human *H3F3A* tagged with Hemagglutinin (HA). Transduced cells were FACS-sorted based on a fluorescent marker and processed for ChIP analysis.

## Synthesis of compound: KDOBA67

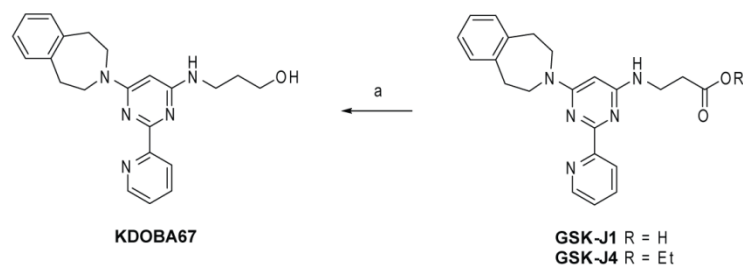

Reagents and conditions: (a)  $\text{LiAlH}_4$ ,  $\text{Et}_2\text{O}$ , THF, 61%; THF, 34%.

3- $\{[2-(\text{pyridin-2-yl})-6-(1,2,4,5\text{-tetrahydro-3H-benzo[d]azepin-3-yl})\text{pyrimidin-4-yl}]\text{amino}\}$ propan-1-ol (KDOBA67).

Method: GSK-J4 was synthesised as previously reported (8). To a mixture of  $\text{LiAlH}_4$  (28 mg, 0.72 mmol) in 3 mL of  $\text{Et}_2\text{O}$  at 0 °C was added dropwise a solution of GSK-J4 (100 mg, 0.24 mmol) in 2 mL of  $\text{Et}_2\text{O}$  and 2 mL of THF. After 1 h at 0 °C the mixture was filtered and the filtrate was washed with  $\text{CH}_2\text{Cl}_2$  (2x 20mL). The combined organic extracts were dried over  $\text{Na}_2\text{SO}_4$ , filtered, and evaporated *in vacuo*. The residue was purified by flash chromatography on silica gel ( $\text{CH}_2\text{Cl}_2/\text{MeOH}$  30:1) to afford the title compound (59 mg, 61%).

MS (ESI):  $m/z$  calcd. for  $(\text{C}_{22}\text{H}_{25}\text{N}_5\text{O}+\text{H})^+$  375.5, found 376.2.

$^1\text{H-NMR}$  (300 MHz,  $\text{CDCl}_3$ )  $\delta$  8.74 (m, 1H), 8.43 (m, 1H), 7.83 – 7.72 (m, 1H), 7.32 (m, 1H), 7.16 – 7.09 (m, 4H), 5.54 (s, 1H), 5.17 (s, 1H), 3.96 – 3.84 (m, 4H), 3.71 – 3.58 (m, 4H), 3.03 – 2.92 (m, 4H), 1.82 – 1.66 (m, 2H).

**IC<sub>50</sub> Determination of GSK-J1 analogs.** The potency of the GSK-J1 bioisostere KDOBA67 was determined against JMJD3, JARID1A, JARID1B, JARID1C, JMJD2C and JMJD1A (KDM families 3-6) using the ALPHAscreen (Amplified Luminescence Proximity Homogenous Assay) as previously described (9). This assay detects the product methyl mark using a methyl mark selective antibody coupled to a protein A acceptor bead and a streptavidin donor bead that captures a biotinylated peptide. Recombinant Jmj enzymes were produced in Ecoli or a baculovirus system (9,10). Enzyme reactions were stopped by addition of ethylenediaminetetraacetic acid (EDTA) and the presence of the biotinylated product methyl mark was detected using ALPHAscreen platform (Perkin Elmer). Inhibition assays were

performed in a 384-well plate format using white ProxiPlates (Perkin Elmer). Hydroxy ethyl piperazine ethane sulfonic acid (HEPES) buffer was from Life Technologies. Anti-Histone-H3-K9Me1 and anti-Histone-H3-K9Me2 antibodies were from Abcam, anti-Histone-H3-K27Me2 antibody was from Millipore, and anti-Histone-H3-K4Me2 antibody was from Cell Signaling Technology. Alphascreen General IgG detection kit was from Perkin Elmer. L-ascorbic acid (L-AA), ferrous ammonium sulphate (FAS),  $\alpha$ -Ketoglutaric acid ( $\alpha$ -KG) and bovine serum albumin (A7030) were from Sigma Aldrich. All in vitro assays were performed in assay buffer (50 mM HEPES pH7.5 containing 0.1% BSA and 0.01% Tween-20). Serial titrations of compounds (0.1  $\mu$ l) were transferred into wells of a 384-well ProxiPlate using an Echo Acoustic dispenser (Labcyte) and Jmj enzyme (4.9  $\mu$ l at 2X final assay concentration) was dispensed into each well and allowed to pre-incubate with compound for 15 minutes. Enzyme reactions were initiated by addition of 5  $\mu$ l of a 2x substrate mix consisting of FAS, L-AA,  $\alpha$ -KG and biotinylated peptide and the enzyme reaction progressed for the indicated times. The enzyme reaction was stopped by addition of 5  $\mu$ l of assay buffer containing EDTA (7.5 mM final assay concentration) and NaCl (200 mM final assay concentration). Antibody to the product methyl mark was pre-incubated in the presence of Protein A acceptor beads (0.08 mg/ml) and Streptavidin donor beads (0.08 mg/ml) for 1 hour and the presence of biotin-H3-product in the assay was detected by addition of 5  $\mu$ l of the pre-incubated alphascreen beads (final concentration of 0.02 mg/ml for acceptor and donor beads). After 1 hour incubation at room temperature the assay plates were read in a BMG Pherastar FS plate reader. Data were normalized to the no-enzyme control and the IC<sub>50</sub> were determined from the nonlinear regression curve fit using GraphPad Prism 5.

**Structure determination of UTY in complex with KDOBA67.** A construct of human UTY (KDM6C) (encompassing aa residues Leu<sup>878</sup>-Ser<sup>1347</sup>) was expressed in Sf9 cells with a tobacco etch virus (TEV) protease-cleavable C-terminal His<sub>10</sub>-tag, essentially as described (4). Generation of recombinant baculo virus, insect cell culture, and infections were performed according to the manufacturer's instructions (Invitrogen). The cells were suspended in a buffer containing 50 mM HEPES pH 7.5, 500 mM NaCl, 10 mM imidazole, 5% glycerol, 0.5 mM TCEP and a protease inhibitor mix (Calbiochem), and purified using nickel affinity chromatography with a stepwise gradient of imidazole after sonication. The eluted protein was then incubated with TEV protease at 4 °C overnight, followed by size exclusion chromatography (Superdex 200). The TEV protease and uncleaved protein were removed using nickel affinity chromatography, and the mass of the cleaved KDM6/UTY protein was verified by electrospray mass ionization time-of-flight mass spectrometry (Agilent LC/MSD).

**Protein crystallisation, X-ray Data collection and structure determination.** To crystallise UTY (KDM6C) with KDOBA67a, the protein (11 mg/mL) was preincubated with 1 mM of the inhibitor and 2 mM MnCl<sub>2</sub>. The protein-compound mixture was then transferred to crystallization plates using the sitting drop vapour diffusion method at 4 °C. Protein crystals were obtained in a drop consisting of 100 nL protein-compound and 100 nL of a precipitant consisting of 25% (w/v) PEG 3350, and 0.1 M bis-tris pH 6.5. Crystals were cryoprotected with mother liquor supplemented with 25% ethylene glycol before they were flash-frozen in liquid nitrogen. A data set with a diffraction limit of 2.0 Å was collected on beamline I04-1 at the Diamond Light source. The data were processed with XDS, scaled and merged using Aimless. The structure was determined by molecular replacement using UTY PDB ID 3ZLI (11) as a search model. The protein-ligand model was further improved by subsequent cycles of model building in coot and refinement in *REFMAC* (12). The refinement was terminated when there were no significant changes in the  $R_{\text{work}}$  and  $R_{\text{free}}$  values and inspection of the difference density maps suggested that no further corrections or additions were justified. The quality of the structure was assessed with the MolProbity server and deposited in Protein Data Bank with the PDB code 5A1L. Data collection and refinement statistics are given in **Table S3**.

## **Supplementary Acknowledgements**

We would like to thank the Cancer Research UK Experimental Cancer Centre which provided support from the Genomics and Genome Engineering, Microscopy and Imaging, Pathology Services and Flow Cytometry Core facilities. AMF is a NIHR senior investigator, and the work was supported by the National Institute for Health Research, UCLH Biomedical Research Centre.

The Structural Genomics Consortium is a registered charity (number 1097737) that receives funds from Abbvie, Bayer Healthcare, Boehringer Ingelheim, the Canadian Institutes for Health Research, the Canadian Foundation for Innovation, Eli Lilly and Company, Genome Canada, GlaxoSmithKline, the Ontario Ministry of Economic Development and Innovation, Janssen, the Novartis Research Foundation, Pfizer, Takeda, and the Wellcome Trust.

## Supplementary References

1. Ernst J, Kheradpour P, Mikkelsen TS, Shores N, Ward LD, Epstein CB, et al. Mapping and analysis of chromatin state dynamics in nine human cell types. *Nature*. Nature Publishing Group; 2011;473:43–9.
2. Miga KH, Eisenhart C, Kent WJ. Utilizing mapping targets of sequences underrepresented in the reference assembly to reduce false positive alignments. *Nucleic Acids Res*. 2015.
3. Thurman RE, Rynes E, Humbert R, Vierstra J, Maurano MT, Haugen E, et al. The accessible chromatin landscape of the human genome. *Nature*. 2012.
4. Bernstein BE, Birney E, Dunham I, Green ED, Gunter C, Snyder M. An integrated encyclopedia of DNA elements in the human genome. *Nature* [Internet]. 2012/09/08. 2012;489:57–74.
5. Sanjana NE, Shalem O, Zhang F. Improved vectors and genome-wide libraries for CRISPR screening. *Nat Methods* [Internet]. Nature Publishing Group; 2014;11:783–4.
6. Ohguchi H, Harada T, Sagawa M, Kikuchi S, Tai YT, Richardson PG, et al. KDM6B modulates MAPK pathway mediating multiple myeloma cell growth and survival. *Leukemia* [Internet]. Nature Publishing Group; 2017;31:2661–9.
7. Rohland N, Reich D. Cost-effective , high-throughput DNA sequencing. *Genome Res*. 2011;939–46.
8. Kruidenier L, Chung C, Cheng Z, Liddle J, Che K, Joberty G, et al. A selective jumonji H3K27 demethylase inhibitor modulates the proinflammatory macrophage response. *Nature* 2012;488:404–8.
9. Kawamura A, Tumber A, Rose NR, King ONF, Daniel M, Oppermann U, et al. Development of homogeneous luminescence assays for histone demethylase catalysis and binding. *Anal Biochem*. 2010;404:86–93.
10. Hatch SB, Yapp C, Montenegro RC, Savitsky P, Gamble V, Tumber A, et al. Assessing histone demethylase inhibitors in cells: Lessons learned. *Epigenetics and Chromatin*. 2017;10:1–17.
11. Walport LJ, Hopkinson RJ, Vollmar M, Madden SK, Gileadi C, Oppermann U, et al. Human UTY(KDM6C) is a Male-Specific Nε-Methyl Lysyl-Demethylase. *J Biol Chem*. 2014.
12. Lo WW, Pinnaduwa D, Gokgoz N, Wunder JS, Andrulis IL. Aberrant hedgehog signaling and clinical outcome in osteosarcoma. *Sarcoma*. 2014;2014:1–10.
